# Supplementary material for: Acid-responsive metal organic frameworks with photothermal effects for osteoarthritis multiple therapy
Source: Royal Society of Chemistry journal article supplement (doi:10.1039/d5ra04833h), 2026-01-01
Supplement: d5ra04833h1.pdf [file d5ra04833h1.pdf]

## Acid- responsive metal organic frameworks with photothermal effects for osteoarthritis synergistic therapy

Xin Feng <sup>a#</sup>, Yiqing Zhang <sup>a</sup>, Song Chen <sup>a</sup>, Yanfeng Ding <sup>a b\*</sup>

<sup>a</sup> Department of Orthopedics, The Third People's Hospital Health Care Group of Cixi, Ningbo, 315300, China

<sup>b</sup> Guangxi medical university, Nanning, 530000, China

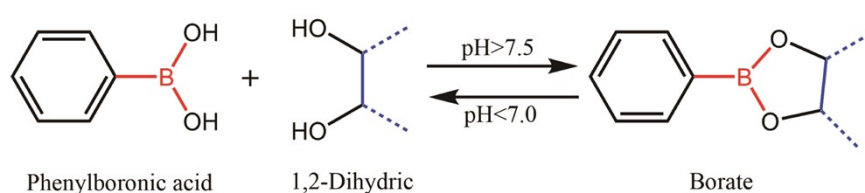

Scheme. 1

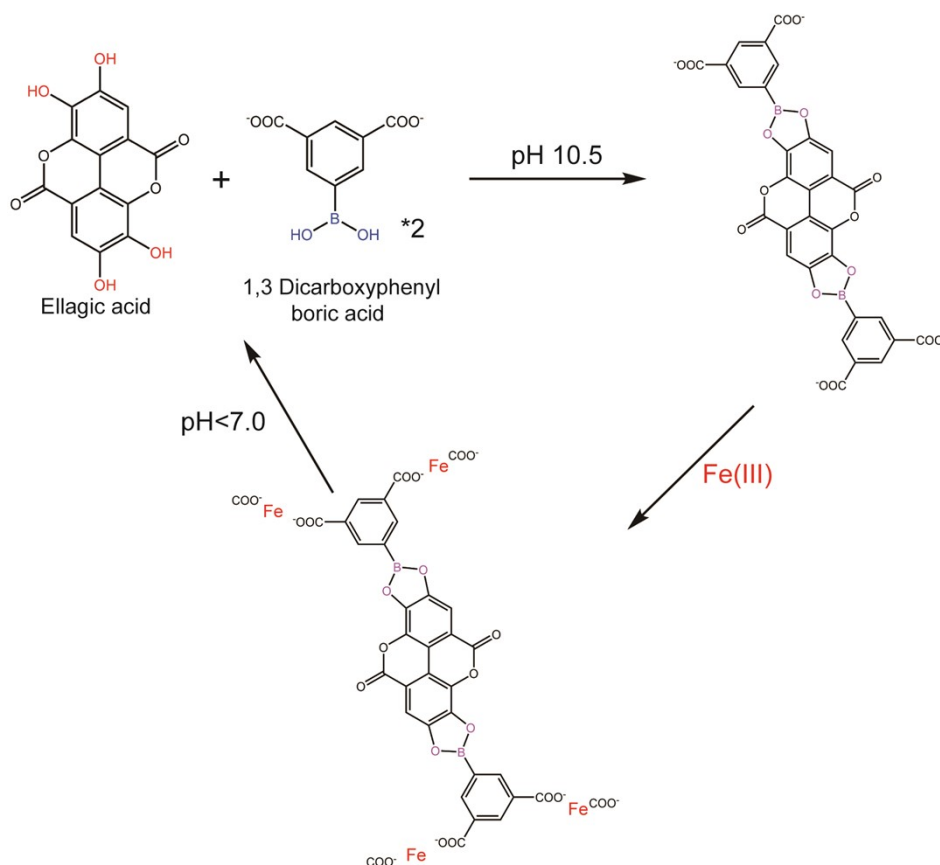

Scheme. 2

**Fig. S1.** Scheme. 1 The reaction of PBA and diol, combined under alkaline conditions and dissociated under acidic conditions. Scheme. 2 The specific synthesis process of EA.

i

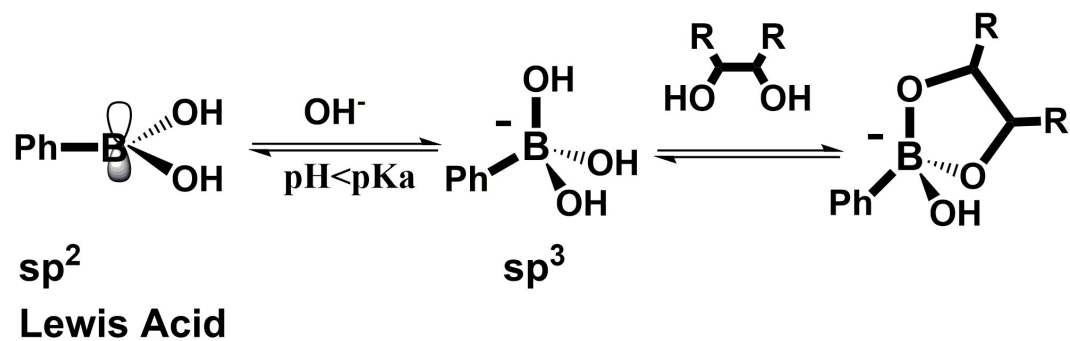

ii

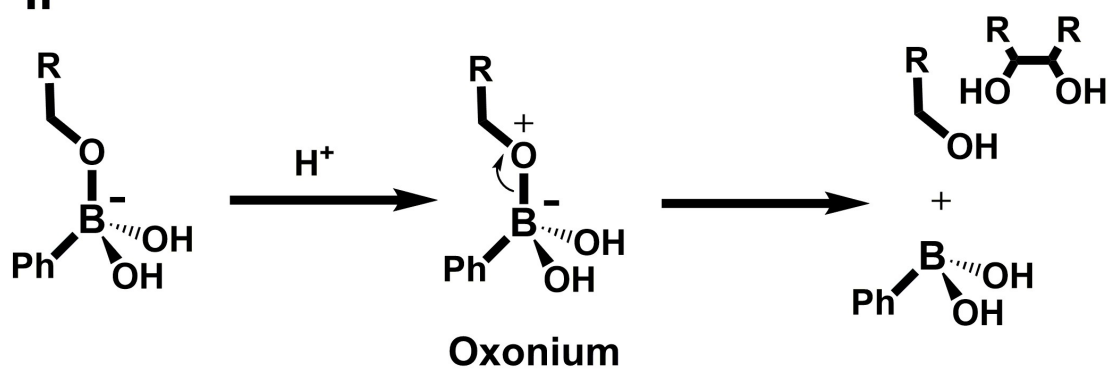

**Fig. S2.** Scheme: i: The combination of PBA and Diol; ii: Hydrolysis of borate esters.

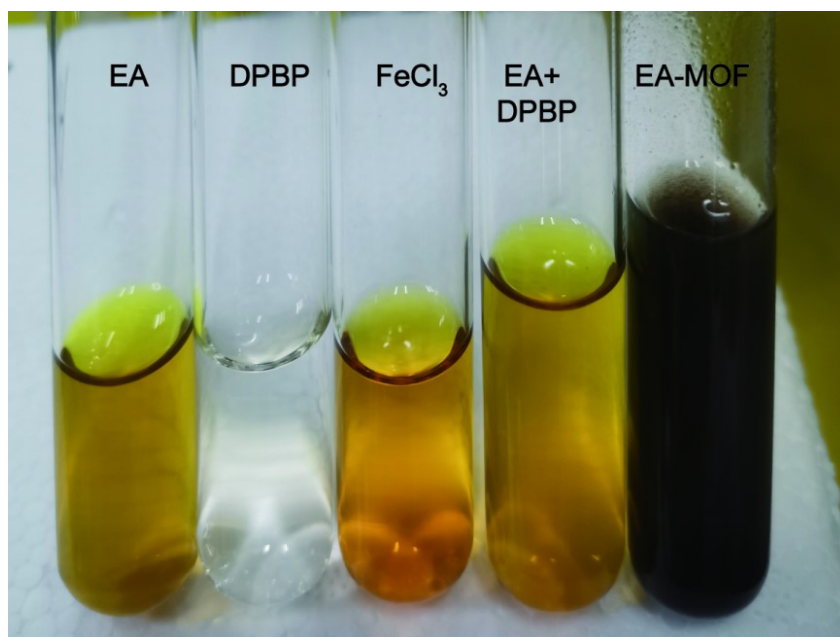

**Fig. S3.** Picture of synthesis of EA-MOF.

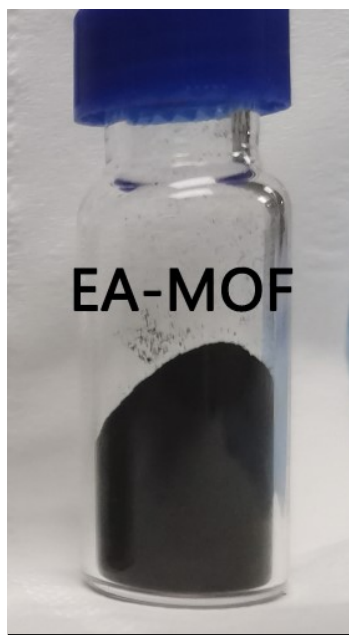

**Fig. S4.** The picture of EA-MOF powder.

| Theoretical calculation                                                                       |                         |          |                          |
|-----------------------------------------------------------------------------------------------|-------------------------|----------|--------------------------|
| Molecular formula                                                                             | Molecular weight        | B% (m/m) | EA% (m/m)                |
| (C <sub>30</sub> H <sub>8</sub> B <sub>2</sub> O <sub>16</sub> Fe <sub>2</sub> ) <sub>n</sub> | (757.6) <sub>n</sub>    | 3.1%     | 39.3%                    |
| Tested                                                                                        |                         |          |                          |
| B%(SEM)                                                                                       | B% (Elemental analysis) |          | EA% (m/m)                |
| 4.9% (m/m)                                                                                    | 5.17% (m/m)             |          | 41.7% (Acid dissolution) |

**Table.1.** Content of EA and B element.

| Name   | Specific surface area (m <sup>2</sup> /g) |
|--------|-------------------------------------------|
| EA     | 0.750348                                  |
| Fe-OH  | 18.91207                                  |
| EA-MOF | 143.208671                                |

**Table.2.** BET of EA, Fe-OH and EA-MOF.

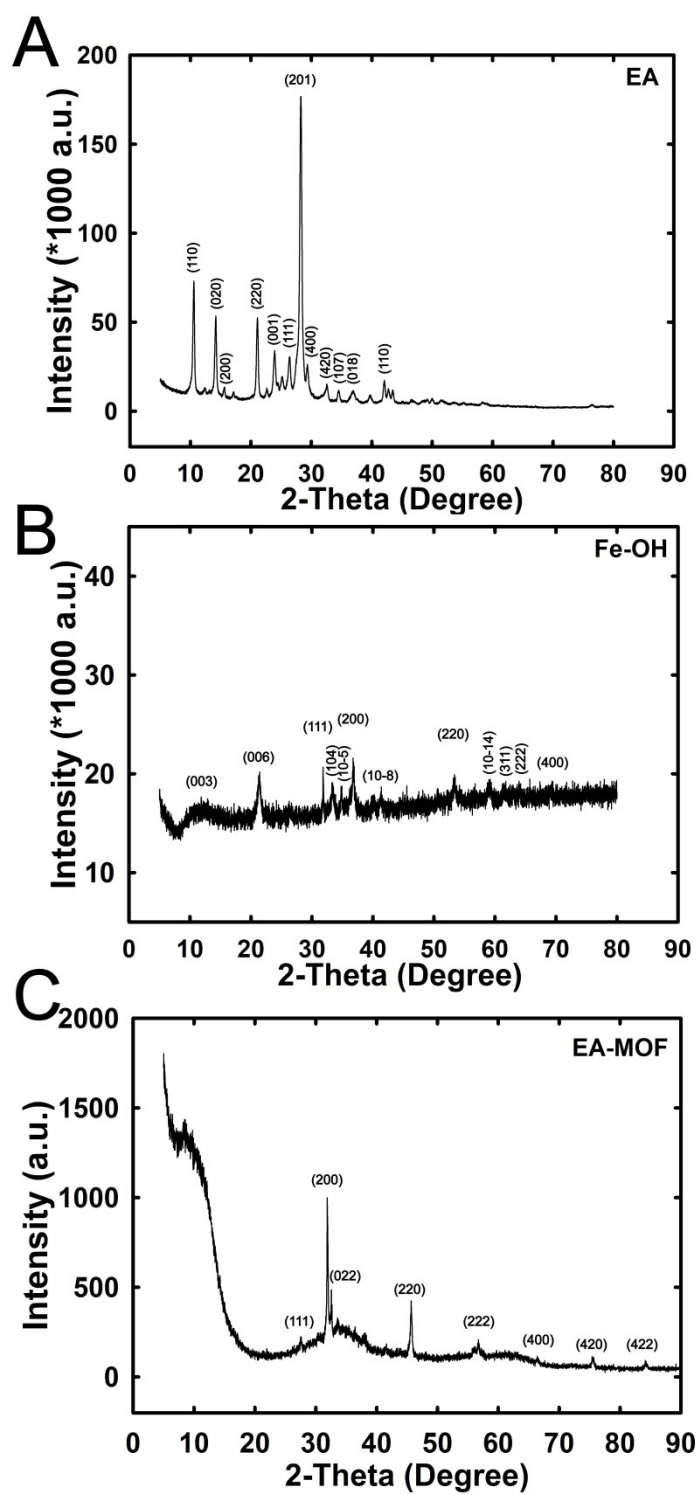

Fig. S5. The XRD for: A: EA; B: Fe-OH; C: EA-MOF.

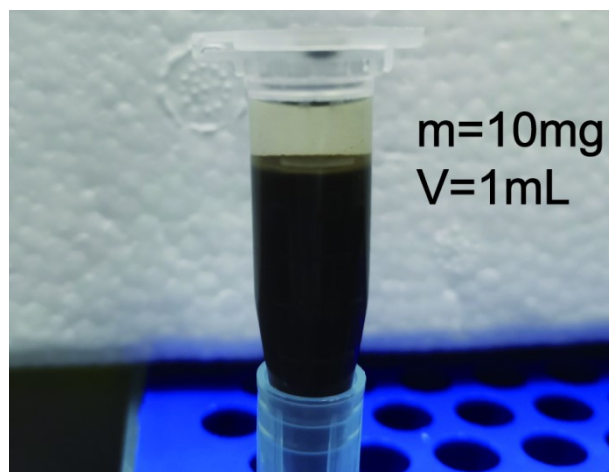

**Fig. S6.** The density of MOF in the water.

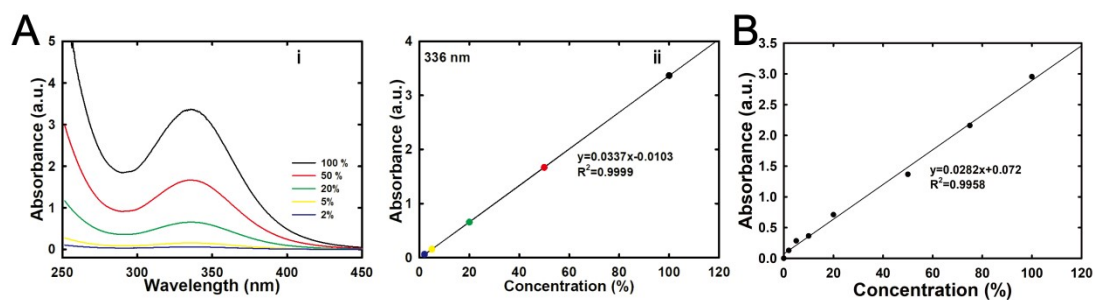

**Fig. S7.** Light absorption characteristics of EA-MOF dissolve solution. (A) i. Light absorption characteristics of dissolve solutions with different concentrations. ii. Standard curve of maximum light absorption peak (336nm) (Ultraviolet-visible spectrophotometer). (B) Standard curve at 336 nm (microplate reader).



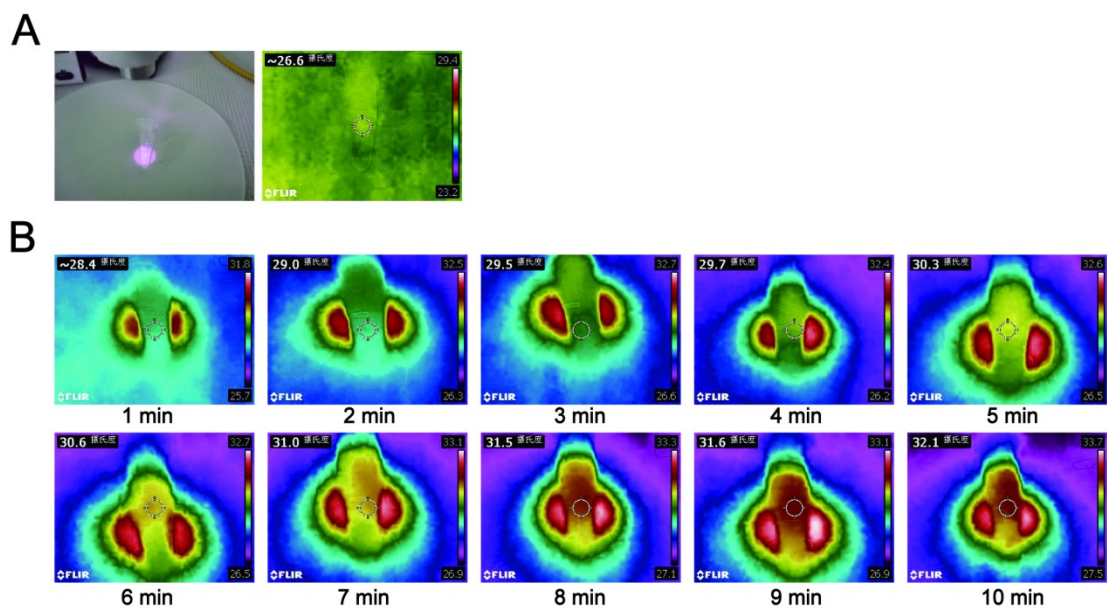

**Fig. S8.** Picture of photothermal conversion. (A) Visible light photograph and initial infrared photograph. (B) Infrared photos at different times of EA-MOF (100  $\mu\text{g/mL}$ ).

| Gene name | Forward primer              | Reverse primer              |
|-----------|-----------------------------|-----------------------------|
| GAPDH     | 5'-TCCAGTATGACTCTACCCAGC-3' | 5'-CACGACATACTCAGCACCAG-3'  |
| GSH-Px    | 5'-TCTGAGGGGATTTTCTGGA-3'   | 5'-TGGTATCTGGGCTTGGTGAT-3'  |
| Acan      | 5'-GAATGGGAGCCAGCCTACAC-3'  | 5'-GAGAGGCAGAGGGACTTTCG-3'  |
| SOD1      | 5'-ATTCACTTCGAGCAGAAGGCA-3' | 5'-ATTGCCCAGGTCTCCAACAT-3'  |
| MMP-13    | 5'-GGACAAAGACTATCCCCGCC-3'  | 5'-GGCATGACTCTCACAATGCG-3'  |
| IL-6      | 5'-TCTGGTCTTCTGGAGTTCCG-3'  | 5'-AGCATTGGAAGTTGGGGTAGG-3' |
| MMP-3     | 5'-GGCTGTGTGCTCATCCTACC-3'  | 5'-TGGAAAGGTACTGAAGCCACC-3' |

**Table 3.** Detailed gene primer sequences for qRT- PCR.

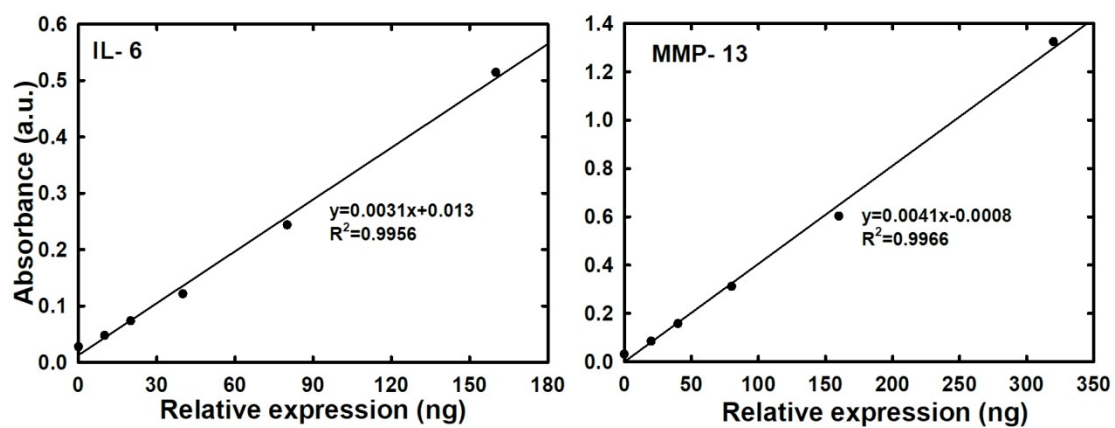

**Fig. S9.** Standard curve of inflammatory factors (IL-6 and MMP-13) by UV- vis spectroscopy.

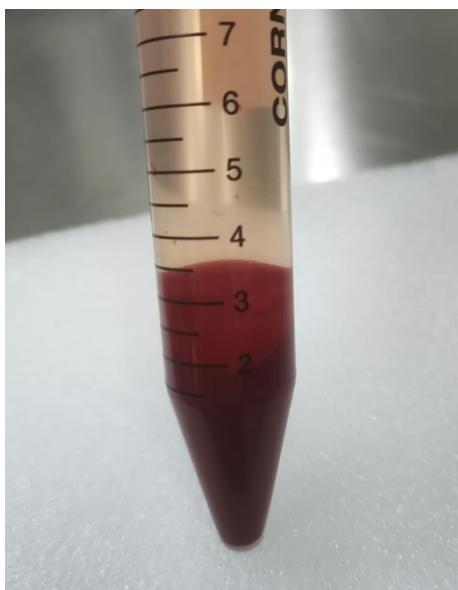

**Fig. S10.** Suspended erythrocyte (after centrifugation, 800rpm/20min). Erythrocyte collected from SD rat caudal vein, Use sodium citrate for anticoagulation and wash with saline.

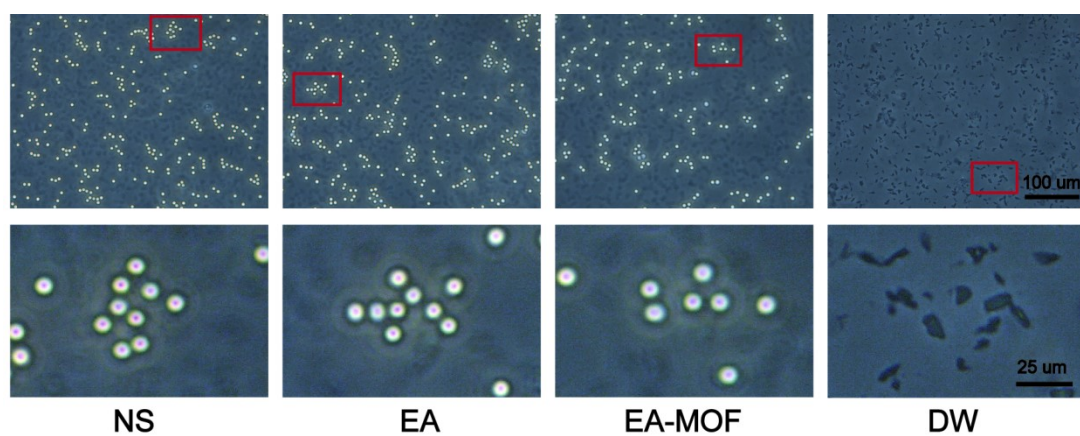

**Fig. S11.** The hemolysis experiment was observed under the microscope (up) and partially enlarged detail (down).

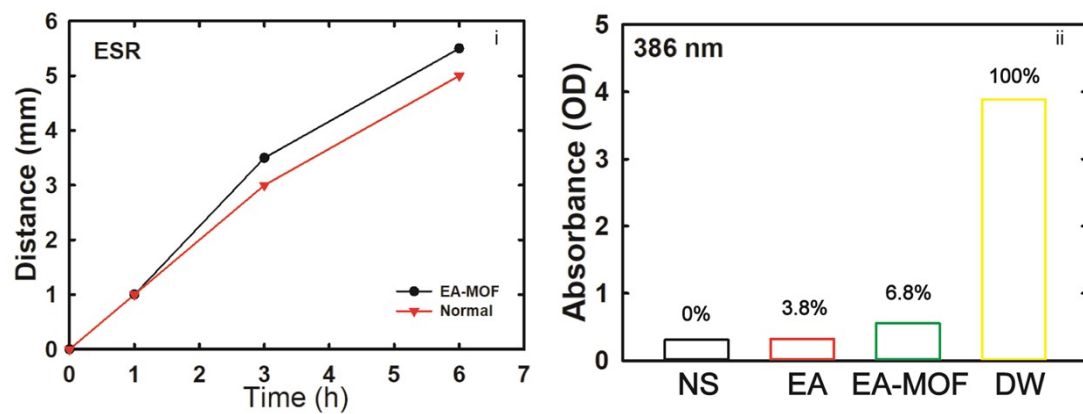

**Fig. S12.** (Left) Quantification of sedimentation test. (Right) Quantification of hemolysis test use microplate reader.
